# Supplementary material for: Internal state configures olfactory behavior and early sensory processing in Drosophila larvae
Source: PubMed Central journal article supplement — Sci Adv. 2021 Jan 1;7(1):eabd6900. doi: 10.1126/sciadv.abd6900 (PMC7775770; doi:10.1126/sciadv.abd6900), 2021-01-01
Supplement: abd6900_SM.pdf [file abd6900_SM.pdf]

## Supplementary Materials for

### **Internal state configures olfactory behavior and early sensory processing in *Drosophila* larvae**

Katrin Vogt\*, David M. Zimmerman, Matthias Schlichting, Luis Hernandez-Nunez, Shanshan Qin, Karen Malacon, Michael Rosbash, Cengiz Pehlevan, Albert Cardona, Aravinthan D. T. Samuel\*

\*Corresponding author. Email: [katrinvogt@fas.harvard.edu](mailto:katrinvogt@fas.harvard.edu), [katrin.vogt@uni-konstanz.de](mailto:katrin.vogt@uni-konstanz.de) (K.V.); [samuel@physics.harvard.edu](mailto:samuel@physics.harvard.edu) (A.D.T.S.)

Published 1 January 2021, *Sci. Adv.* 7, eabd6900 (2021)  
DOI: 10.1126/sciadv.abd6900

#### **This PDF file includes:**

Tables S1 to S4  
Figs. S1 to S7  
References

## Supplementary Tables and Figures

**Table S1. Fly lines used in this study.**

| Line                                                                                        | Source                                                                               |
|---------------------------------------------------------------------------------------------|--------------------------------------------------------------------------------------|
| <i>Orco</i> <sup>1</sup>                                                                    | BDSC #23129                                                                          |
| <i>GH146-GAL4</i>                                                                           | BDSC #30026                                                                          |
| <i>GMR32E03-GAL4</i>                                                                        | BDSC #49716                                                                          |
| <i>UAS-Kir2.1</i>                                                                           | BDSC #6596                                                                           |
| <i>Orco-GAL4</i>                                                                            | BDSC #23292                                                                          |
| <i>Or82a-GAL4</i>                                                                           | BDSC #23125                                                                          |
| <i>Or45a-GAL4</i>                                                                           | BDSC #9975                                                                           |
| <i>UAS-GCaMP6m; Orco::RFP</i>                                                               | This study ( <i>UAS-GCaMP6m</i> , BDSC #42748;<br><i>Orco::RFP</i> , BDSC #63045)    |
| <i>UAS-GluC1α-RNAi</i> (TRiP HMC03585)                                                      | BDSC #53356                                                                          |
| <i>pLN1-GAL4</i> (split)                                                                    | This study ( <i>GMR21D06-AD</i> , BDSC #70117;<br><i>GMR50A06-DBD</i> , BDSC #68988) |
| <i>pLN3-GAL4</i> (split; SS004499)                                                          | J. Truman ( <i>GMR42E06-AD</i> , BDSC #71054;<br><i>GMR12C03-DBD</i> , BDSC #70429)  |
| <i>pLN4-GAL4</i> (split; SS001730)                                                          | J. Truman ( <i>GMR21D06-AD</i> , BDSC #70117;<br><i>GMR12C03-DBD</i> , BDSC #70429)  |
| <i>UAS-mCD8::GFP; Orco::RFP</i>                                                             | BDSC #63045                                                                          |
| <i>5-HT7-GAL4</i>                                                                           | M. Pankratz (58)                                                                     |
| <i>UAS-gRNA-5-HT7; UAS-Cas9</i>                                                             | This study (Rosbash lab)                                                             |
| <i>GMR60F02-GAL4</i>                                                                        | BDSC #48228                                                                          |
| <i>UAS-Trh-RNAi</i> (TRiP JF01863)                                                          | BDSC #25842                                                                          |
| <i>UAS-CsChrimson::mVenus</i>                                                               | BDSC #55136                                                                          |
| <i>Trh-GAL4</i>                                                                             | BDSC #38389                                                                          |
| <i>DDC-GAL4</i>                                                                             | BDSC #7009                                                                           |
| <i>Trh</i> <sup>c01440</sup>                                                                | BDSC #10531                                                                          |
| <i>UAS-SerT</i>                                                                             | BDSC #24464                                                                          |
| <i>UAS-SerT-RNAi</i> (TRiP HMJ30062)                                                        | BDSC #62985                                                                          |
| <i>5-HT1A-GAL4</i>                                                                          | M. Pankratz (59)                                                                     |
| <i>UAS-gRNA-5-HT1A; UAS-Cas9</i>                                                            | This study (Rosbash lab)                                                             |
| <i>y</i> <sup>1</sup> <i>w</i> <sup>67c23</sup> ; <i>P{CaryP}attPI</i>                      | BDSC #8621                                                                           |
| <i>w</i> <sup>1118</sup> ; <i>sna</i> <sup>Sc0</sup> <i>It</i> <sup>1</sup> /CyO; MKRS/TM6B | BDSC #3703                                                                           |

**Table S2. Guide RNA sequences for CRISPR knockout.**

| gRNA           | Sequence             |
|----------------|----------------------|
| 5-HT1A guide 1 | TAGCGAACAGCATGAATGAC |
| 5-HT1A guide 2 | TGTCATAGCGGCCATTATCC |
| 5-HT1A guide 3 | ACGACCGCGACCCGTCGATG |
| 5-HT7 guide 1  | CACAGAAACCACAGAACCCA |
| 5-HT7 guide 2  | GCATCACCAGCAGCAATTT  |
| 5-HT7 guide 3  | GGATCTCTGTGTGGCTCTTC |

**Table S3. Connection weights for circuit model.** Includes synaptic and non-synaptic interactions ( $W$ , top five rows) and ORN/basal input to each neuron ( $x_{in}$  and  $x_0$ , respectively; bottom two rows).

|        | pLN0     | pLN1/4 | uPN    | mPN      | CSD  |
|--------|----------|--------|--------|----------|------|
| pLN0   | 0        | -1     | $-w$   | $-w$     | $-w$ |
| pLN1/4 | $-w$     | 0      | $-w$   | -1       | 0    |
| uPN    | 0        | 0      | 0      | 0        | 1    |
| mPN    | 0        | 0      | 0      | 0        | 0    |
| CSD    | $-\beta$ | $-w$   | {0, 2} | 0        | 0    |
| ORN    | 1        | 1      | 1      | $w$      | $w$  |
| basal  | 0        | 0      | 0      | $\alpha$ | 0    |

**Table S4. Summarized neural activities in the fed and food-deprived states.**

|               | pLN0 | pLN1/4 | uPN | mPN | CSD |
|---------------|------|--------|-----|-----|-----|
| fed           | 1    | 0      | 1   | 1   | 1   |
| food-deprived | 0    | 1      | 2   | 0   | 2   |

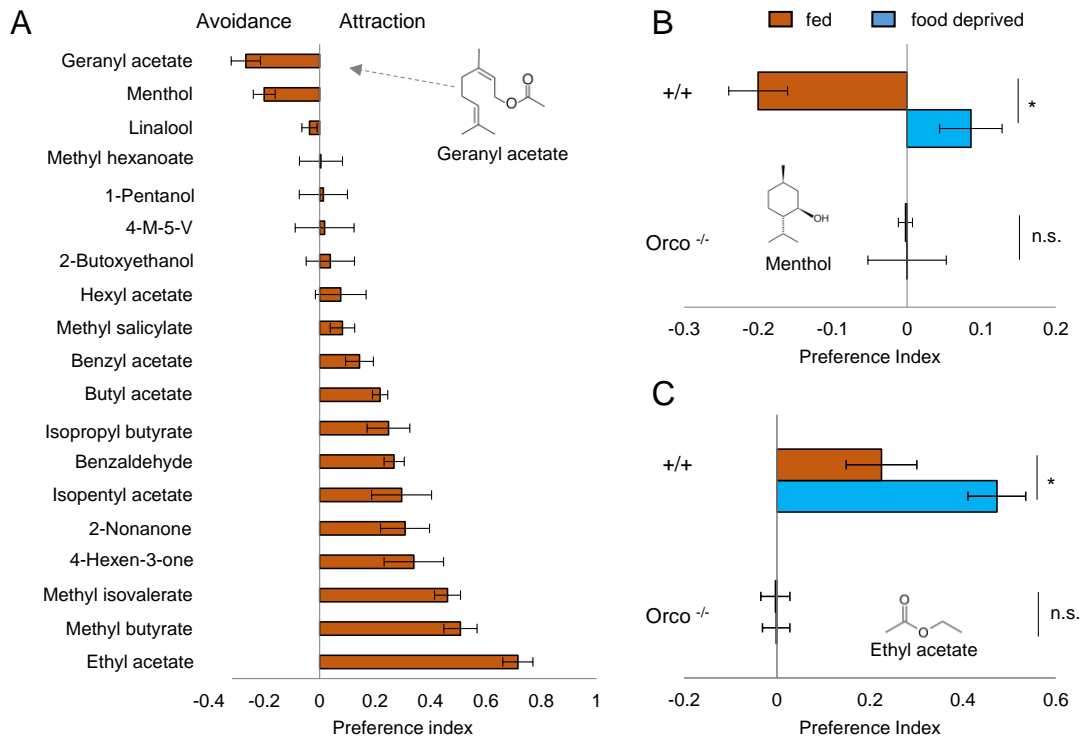

**Fig. S1. Food deprivation induces a change in olfactory decision making across odorants and is ORN dependent.** (A) Odorant screening in fed larvae. Only menthol and geranyl acetate induced aversion, strongest attraction was elicited by ethyl acetate. All odors were tested at a dilution of  $10^{-4}$ , except menthol ( $10^{-3}$ ). (B) After food deprivation, larvae change their response to menthol ( $10^{-3}$ ) from avoidance to attraction (two-sample t-test,  $p < 0.001$ ). Mutant larvae (*Orco*<sup>-/-</sup>) that lack functional ORNs do not show any significant response to the odor in the fed and food deprived state (one-sample t-test,  $p > 0.05$ ) ( $N = 8$ ). (C) Larvae show increased attraction to ethyl acetate ( $10^{-6}$ ) after food deprivation (two-sample t-test,  $p < 0.05$ ). Mutant larvae (*Orco*<sup>-/-</sup>) that lack functional ORNs do not show any significant response to the odor in the fed and food deprived state (one-sample t-test,  $p > 0.05$ ) ( $N = 6-8$ ).

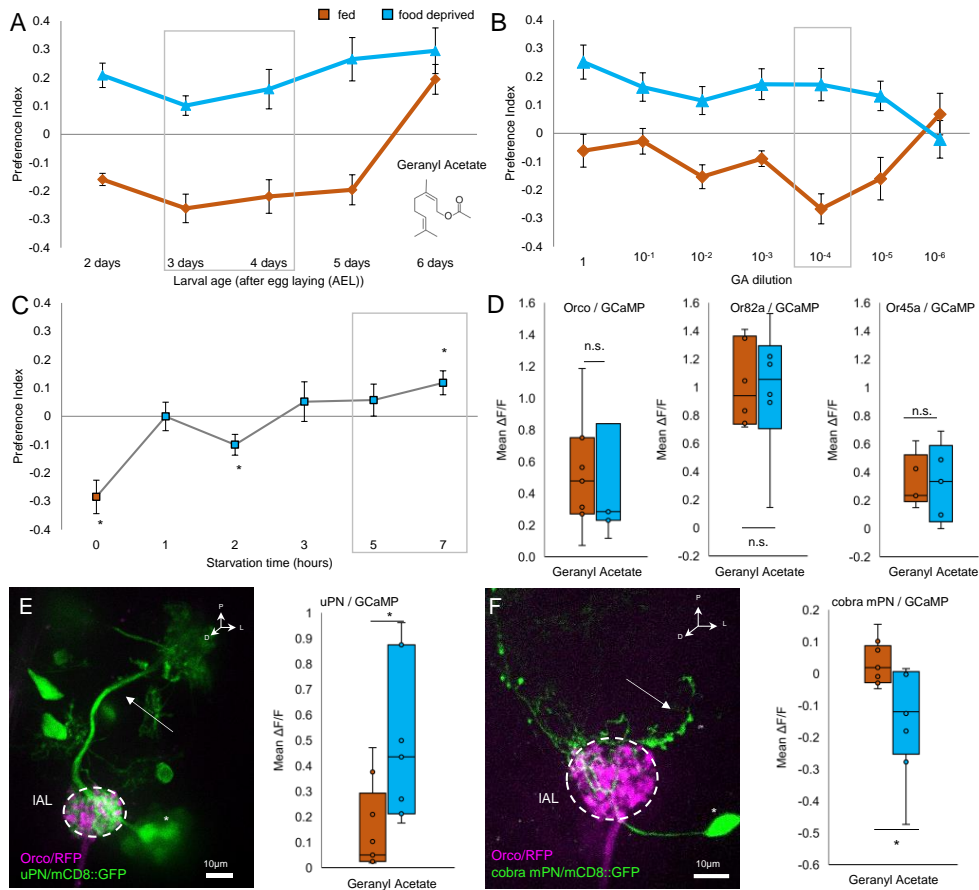

**Fig. S2. GA behavior is stable across test parameters.** (A) The switch in GA  $10^{-4}$  response is present over all larval feeding stages (2–5 days A.E.L., two-sample t-test,  $p < 0.001$ ). Larvae entering the wandering state show attraction already when fed (6 days A.E.L., two-sample t-test,  $p > 0.05$ ) ( $N = 8–10$ ). (B) For each GA dilution tested, except the lowest (two-sample t-test,  $p > 0.05$ ), behavior switches significantly between states (two-sample t-test,  $p < 0.05$ , strongest effect for  $10^{-4}$ : two-sample t-test,  $p < 0.001$ ) ( $N = 6–14$ ). (C) GA ( $10^{-4}$ ) avoidance switches to attraction after food deprivation (one-way ANOVA,  $p < 0.001$ ). Fed larvae avoid GA (one sample t-test,  $p < 0.001$ ). After short food deprivation larvae lose GA avoidance (1 h, 3 h, 5 h, one sample t-test,  $p > 0.05$ ) or only slightly avoid it (2 h, one sample t-test,  $p < 0.05$ ). After 7 hours of food deprivation, larvae show GA attraction (one sample t-test,  $p < 0.05$ ) ( $N = 12–16$ ). (D) ORN calcium responses to GA. Mean response change normalized to baseline. ORNs exhibit same responses to GA ( $10^{-8}$ ) in fed and food deprived state (two-sample t-test,  $p > 0.05$ ) ( $N = 7$ ). ORN-OR82a exhibits same GA ( $10^{-6}$ ) response in both states (two-sample t-test,  $p > 0.05$ ) ( $N = 6$ ). ORN-OR45a exhibits same GA response ( $10^{-6}$ ) in both states (two-sample t-test,  $p > 0.05$ ) ( $N = 5$ ). (E) *GHI46-GAL4* labels uniglomerular projection neurons (uPN *GAL4*-line). Arrow indicates axonal projection. Asterisk indicates cell bodies. Calcium responses in uPNs to GA ( $10^{-6}$ ). Mean response change normalized to baseline. Following food deprivation, uPNs respond stronger to GA (Mann-Whitney U-test,  $p < 0.05$ ) ( $N = 7–9$ ). (F) *GMR32E03-GAL4* labels the cobra mPN. Arrow indicates axonal projection. Asterisk indicates cell body. Calcium response in cobra mPN to GA ( $10^{-6}$ ). Mean response change normalized to baseline. Following food deprivation, the cobra mPN is inhibited by GA (two-sample t-test,  $p < 0.05$ ) ( $N = 8–9$ ). Grey boxes indicate parameters used throughout the study. Data points in (A–C) represent pooled data from 5–15 min during testing (mean  $\pm$  SEM). IAL = larval antennal lobe.

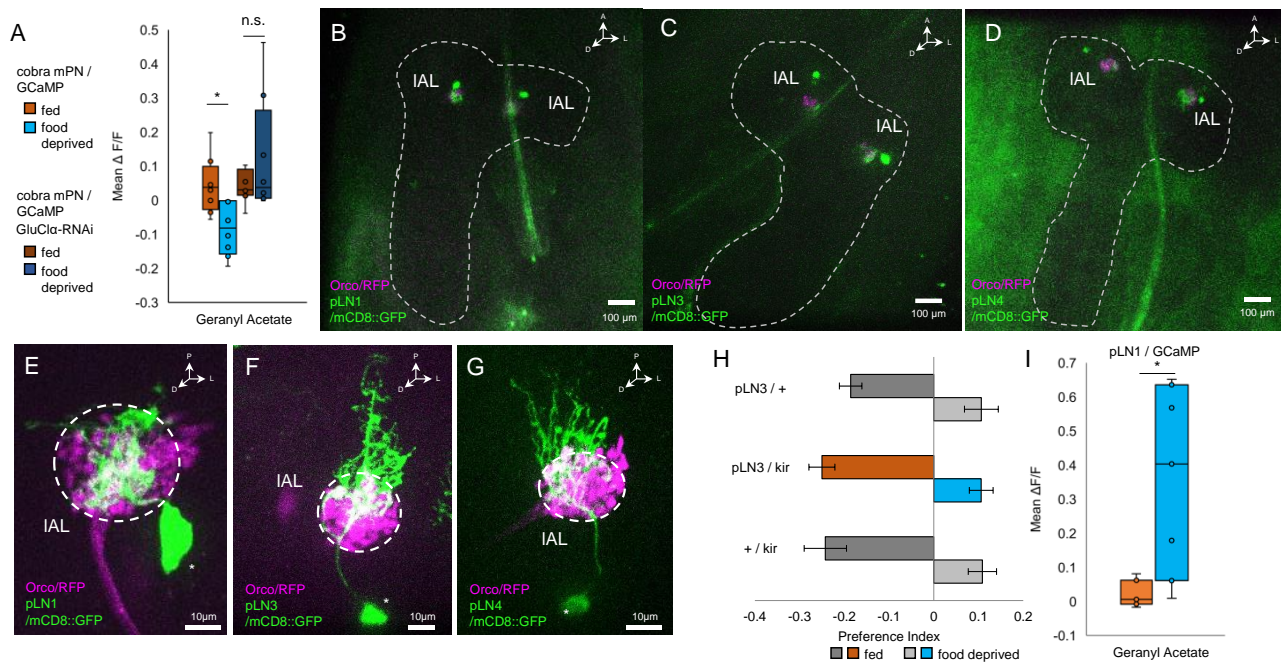

**Fig. S3. Cobra mPN is inhibited by glutamate released from pLN1,4, but not pLN3.** (A) Calcium response in the cobra mPN to GA ( $10^{-6}$ ). Mean response change normalized to baseline. Light colors: The cobra mPN is inhibited by GA in the food deprived state (two-sample t-test,  $p < 0.01$ ). Dark colors: Upon GluCl $\alpha$ -receptor knockdown the cobra mPN shows same response in both states (Mann-Whitney U-test,  $p > 0.05$ ) ( $N = 8$ ). (B–D) Whole brain expression patterns of pLN 1, pLN3 and pLN 4 Split-GAL4 lines. Dashed line = larval brain outline. IAL = larval antennal lobe. (E–G) Expression patterns of pLN 1, pLN3 and pLN 4 Split-GAL4 lines in the IAL. Asterisks indicate cell bodies. IAL = larval antennal lobe. (H) Silencing pLN3 does not impair GA responses in both states (one-way ANOVA,  $p > 0.05$ ) ( $N = 8–10$ ) (I) Calcium response in pLN1 to GA ( $10^{-6}$ ). Mean response change normalized to baseline. The pLN1 does not respond to GA in the fed state but shows increased response after food deprivation (two-sample t-test,  $p < 0.05$ ) ( $N = 7$ ).

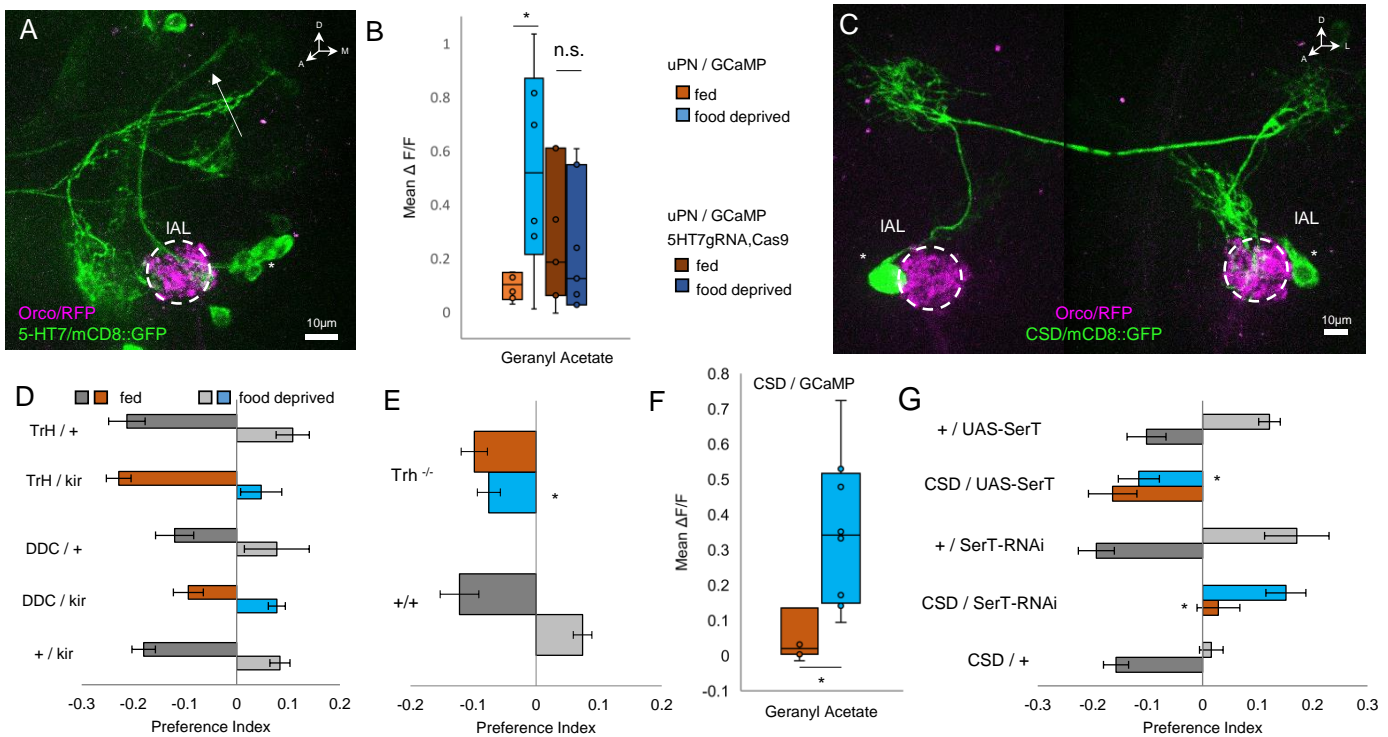

**Fig. S4. Serotonin from CSD excites uPNs.** (A) *5-HT7-GAL4* expression pattern, including uPNs. Arrow indicates axonal projections. Asterisk indicates cell bodies. (B) Calcium response in uPNs to GA ( $10^{-6}$ ). Mean response change normalized to baseline. Light colors: uPNs show increased GA response after food-deprivation (two-sample t-test,  $p < 0.05$ ). Dark colors: Upon 5-HT7 receptor knockout in uPNs, they show same response in both states (two-sample t-test,  $p > 0.05$ ) ( $N = 6-7$ ). (C) *GMR60F02-GAL4* labels the CSD neuron. Asterisks indicates cell bodies. (D) Silencing neurons labeled by *Trh-GAL4* does not affect GA response (one-way ANOVA,  $p > 0.05$ ) ( $N = 6-10$ ). Silencing neurons labeled by *DDC-GAL4* does not affect GA response (one-way ANOVA,  $p > 0.05$ ) ( $N = 6-14$ ). (E) Mutant larvae (*Trh*<sup>-/-</sup>) unable to synthesize serotonin exhibit GA avoidance in fed state (Mann-Whitney U-test,  $p > 0.05$ ), however do not switch to GA attraction after food deprivation (two-sample t-test,  $p < 0.01$ ) ( $N = 6-8$ ). (F) Calcium response in CSD to GA ( $10^{-8}$ ). Mean response change normalized to baseline. CSD responds stronger to GA upon food-deprivation (two-sample t-test,  $p < 0.05$ ) ( $N = 8-10$ ). (G) Overexpression of the serotonin transporter in CSD using *UAS-SerT* only affects food-deprived GA attraction (one-way ANOVA,  $p < 0.01$ ) ( $N = 8$ ). RNAi-knockdown of SerT in CSD only impairs fed GA avoidance (one-way ANOVA,  $p < 0.01$ ) ( $N = 8-10$ ). IAL = larval antennal lobe.

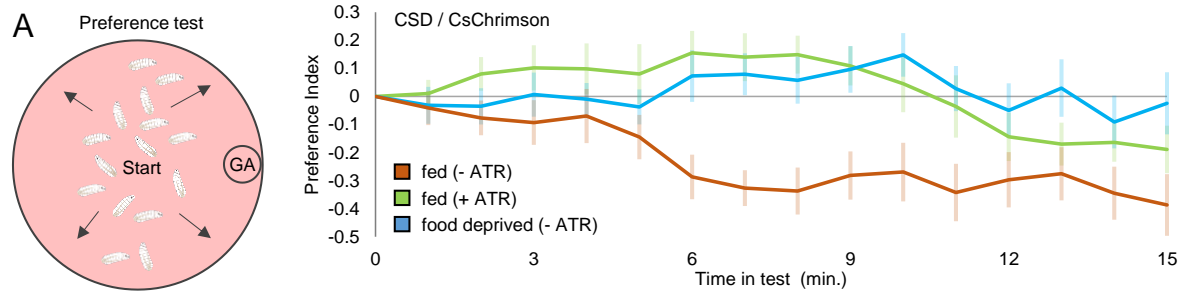

| B            | CSD/<br>Chrimson | CSD/<br>Chrimson | CSD/<br>Chrimson | +/Chrimson | CSD/+     |
|--------------|------------------|------------------|------------------|------------|-----------|
| ATR          | -                | -                | +                | +          | +         |
| State        | fed              | food deprived    | fed              | fed        | fed       |
| GA response  | Avoidance        | Approach         | Approach         | Avoidance  | Avoidance |
| Run length   | ●                | ●                | ●                | ●          | ●         |
| Run speed    | ●                | ●                | ●                | ●          | ●         |
| Run duration | ●                | ●                | ●                | ●          | ●         |

● unchanged      ● increased      ● decreased

**Fig. S5. CSD activation affects locomotion parameters differently than food deprivation.** (A) Activation of the CSD neuron by expressing *UAS-CsChrimson* in fed larvae mimics the food deprived GA response behavior. (B) Locomotion parameters of larvae. Food deprived larvae show increased run length due to increased run speed and run duration. Artificial activation of CSD only induces an increase in run duration.



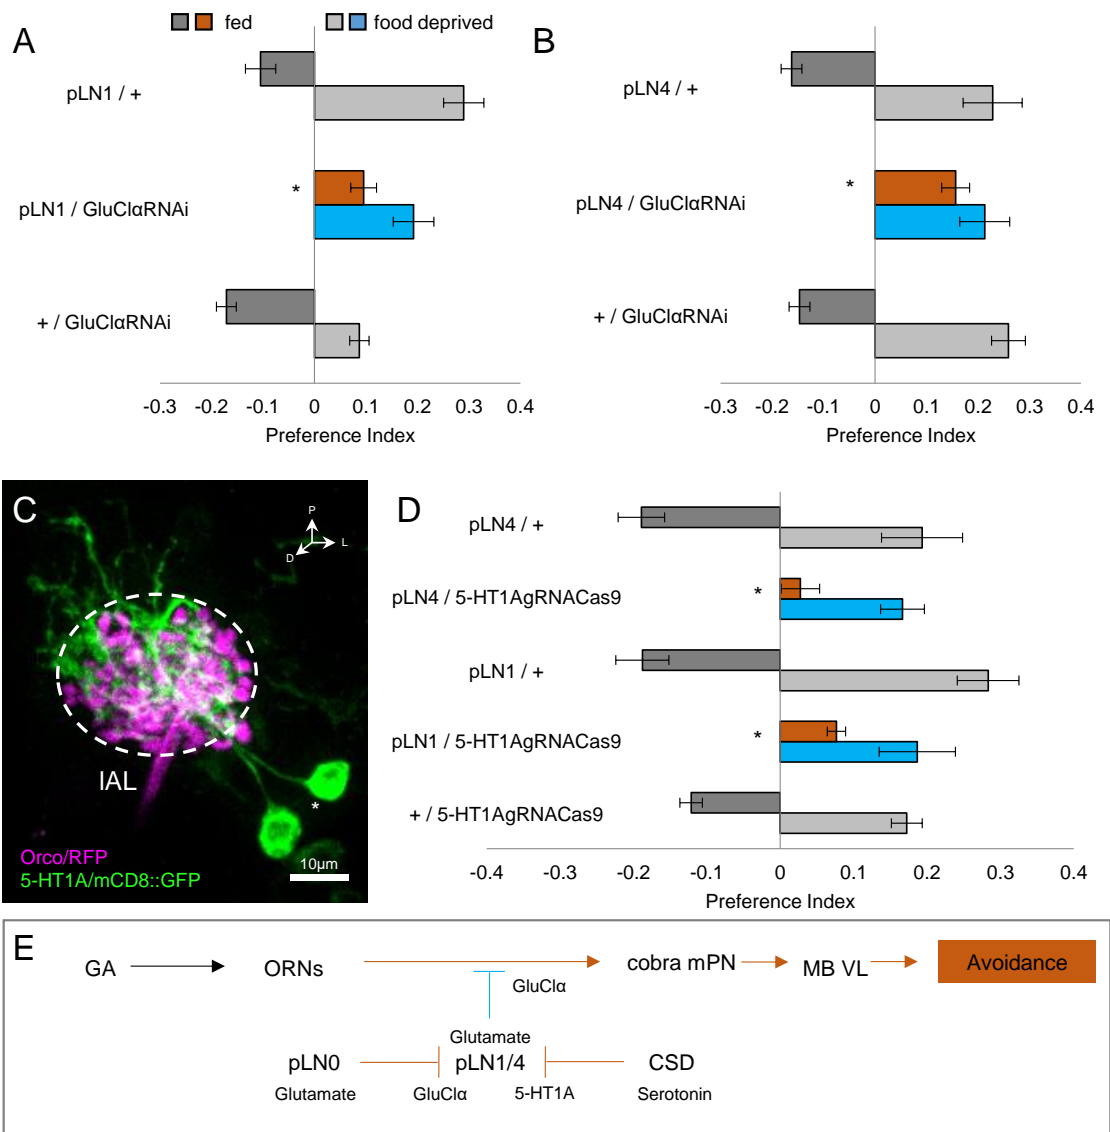

**Fig. S6. pLN1/4 receive glutamatergic and serotonergic inhibition in the fed state.** (A) Knockdown of the GluCl $\alpha$ -receptor in pLN1 only impairs fed GA avoidance (one-way ANOVA,  $p < 0.001$ ) ( $N = 8-12$ ). (B) Knockdown of the GluCl $\alpha$ -receptor in pLN4 only impairs fed GA avoidance (one-way ANOVA,  $p < 0.001$ ) ( $N = 7-8$ ). (C) Expression pattern of *5-HT1A-GAL4*, labelling two local IAL neurons. Asterisk indicates cell bodies. IAL = larval antennal lobe. (D) Knockdown of the 5-HT1A receptor in pLNs only impairs fed GA avoidance (one-way ANOVA,  $p < 0.001$ ) ( $N = 6-16$ ). (E) In the fed state, pLN1/4 are inhibited by a glutamatergic neuron (presumably pLN0) and the serotonergic CSD neuron, overall reducing inhibition onto cobra mPN.

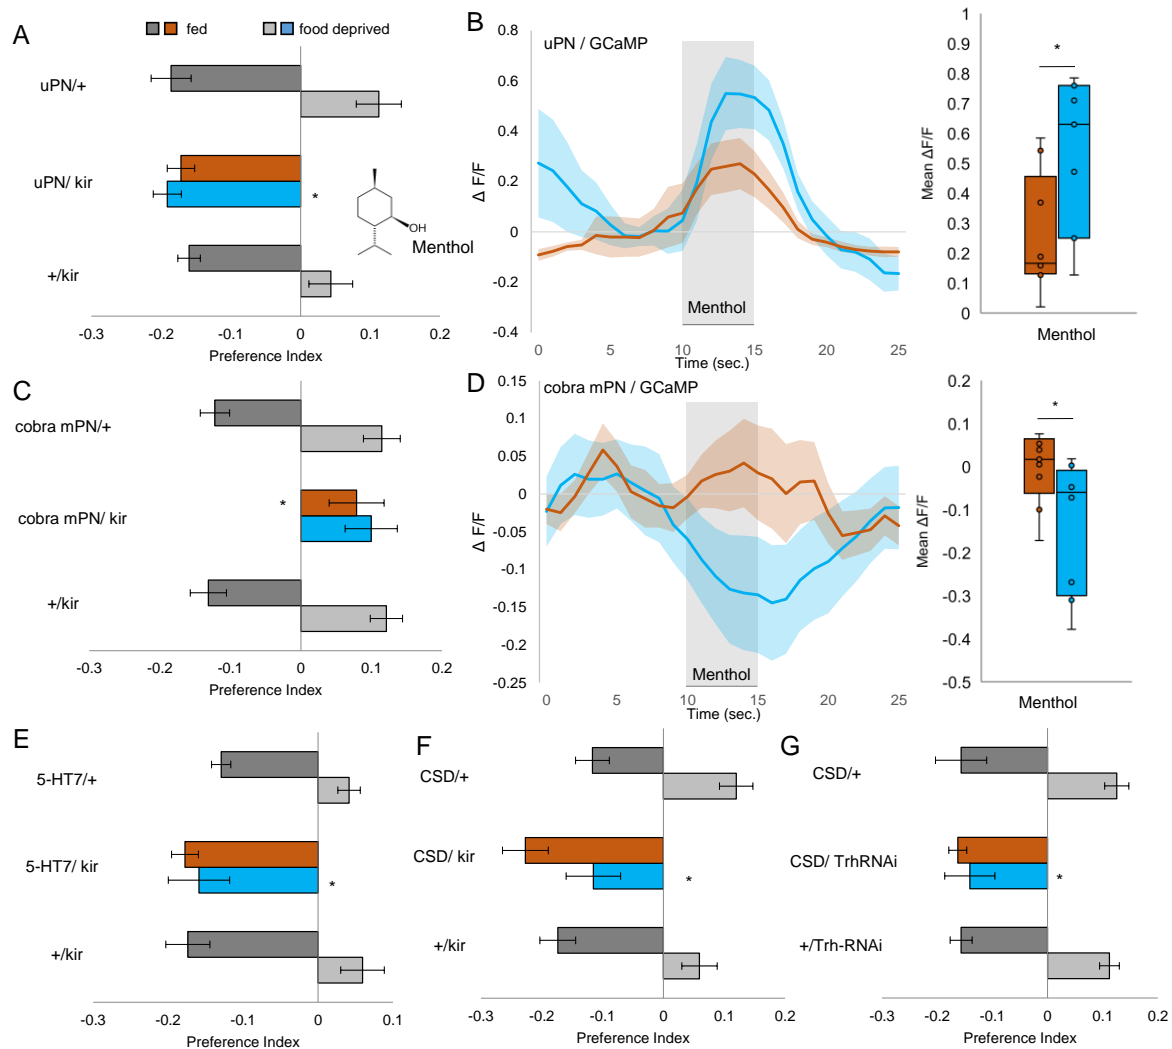

**Fig. S7. State dependent olfactory behavior in response to the odorant menthol requires the same neural circuit as for GA. (A)** Silencing uPNs (*GHI46-GAL4*) only abolishes attraction to menthol in food-deprived larvae (one-way ANOVA,  $p < 0.001$ ) ( $N = 4-6$ ). **(B)** Food deprivation increases uPN responses to menthol (two-sample t-test,  $p < 0.05$ ) ( $N = 7-9$ ). **(C)** Silencing cobra mPN (*GMR32E03-GAL4*) only abolishes menthol avoidance in the fed state (one-way ANOVA,  $p < 0.01$ ) ( $N = 6$ ). **(D)** Food deprivation decreases mPN response to menthol (two-sample t-test,  $p < 0.05$ ) ( $N = 8-9$ ). **(E)** Silencing *5-HT7-GAL4* labelled neurons abolishes attraction to menthol in the food-deprived state (one-way ANOVA,  $p < 0.01$ ) ( $N = 8-10$ ). **(F)** Silencing CSD (*GMR60F02-GAL4*) only abolishes attraction to menthol after food-deprivation (one-way ANOVA,  $p < 0.01$ ) ( $N = 8-10$ ). **(G)** Knockdown of serotonin synthesis in CSD only abolishes attraction to menthol after food-deprivation (one-way ANOVA,  $p < 0.01$ ) ( $N = 8$ ).

## REFERENCES AND NOTES

1. D. DiBattista, M. Bedard, Effects of food deprivation on hunger motivation in golden hamsters (*Mesocricetus auratus*). *J. Comp. Psychol.* **101**, 183–189 (1987).
2. Q. Wu, Z. Zhao, P. Shen, Regulation of aversion to noxious food by *Drosophila* neuropeptide Y- and insulin-like systems. *Nat. Neurosci.* **8**, 1350–1355 (2005).
3. H. K. Inagaki, K. M. Panse, D. J. Anderson, Independent, reciprocal neuromodulatory control of sweet and bitter taste sensitivity during starvation in *Drosophila*. *Neuron* **84**, 806–820 (2014).
4. M. Crossley, K. Staras, G. Kemenes, A central control circuit for encoding perceived food value. *Sci. Adv.* **4**, eaau9180 (2018).
5. C. M. Root, K. I. Ko, A. Jafari, J. W. Wang, Presynaptic facilitation by neuropeptide signaling mediates odor-driven food search. *Cell* **145**, 133–144 (2011).
6. K. I. Ko, C. M. Root, S. A. Lindsay, O. A. Zaninovich, A. K. Shepherd, S. A. Wasserman, S. M. Kim, J. W. Wang, Starvation promotes concerted modulation of appetitive olfactory behavior via parallel neuromodulatory circuits. *eLife* **4**, e08298 (2015).
7. C.-H. Tsao, C.-C. Chen, C.-H. Lin, H.-Y. Yang, S. Lin, *Drosophila* mushroom bodies integrate hunger and satiety signals to control innate food-seeking behavior. *eLife* **7**, e35264 (2018).
8. R. I. Wilson, Early olfactory processing in *Drosophila*: Mechanisms and principles. *Annu. Rev. Neurosci.* **36**, 217–241 (2013).
9. M. E. Berck, A. Khandelwal, L. Claus, L. Hernandez-Nunez, G. Si, C. J. Tabone, F. Li, J. W. Truman, R. D. Fetter, M. Louis, A. D. Samuel, A. Cardona, The wiring diagram of a glomerular olfactory system. *eLife* **5**, e14859 (2016).
10. S. R. Olsen, R. I. Wilson, Lateral presynaptic inhibition mediates gain control in an olfactory circuit. *Nature* **452**, 956–960 (2008).

11. L. M. Masuda-Nakagawa, N. Gendre, C. J. O’Kane, R. F. Stocker, Localized olfactory representation in mushroom bodies of *Drosophila* larvae. *Proc. Natl. Acad. Sci. U.S.A.* **106**, 10314–10319 (2009).
12. N. K. Tanaka, K. Endo, K. Ito, Organization of antennal lobe-associated neurons in adult *Drosophila melanogaster* brain. *J. Comp. Neurol.* **520**, 4067–4130 (2012).
13. A. S. Bates, P. Schlegel, R. J. V. Roberts, N. Drummond, I. F. M. Tamimi, R. Turnbull, X. Zhao, E. C. Marin, P. D. Popovici, S. Dhawan, A. Jamasb, A. Javier, F. Li, G. M. Rubin, S. Waddell, D. D. Bock, M. Costa, G. S. X. E. Jefferis, Complete connectomic reconstruction of olfactory projection neurons in the fly brain. *Curr. Biol.* **30**, 3183–3199.e6 (2020).
14. F. Python, R. F. Stocker, Immunoreactivity against choline acetyltransferase,  $\gamma$ -aminobutyric acid, histamine, octopamine, and serotonin in the larval chemosensory system of *Drosophila melanogaster*. *J. Comp. Neurol.* **453**, 157–167 (2002).
15. A. M. Dacks, T. A. Christensen, J. G. Hildebrand, Phylogeny of a serotonin-immunoreactive neuron in the primary olfactory center of the insect brain. *J. Comp. Neurol.* **498**, 727–746 (2006).
16. E. Fishilevich, A. I. Domingos, K. Asahina, F. Naef, L. B. Vosshall, M. Louis, Chemotaxis behavior mediated by single larval olfactory neurons in *Drosophila*. *Curr. Biol.* **15**, 2086–2096 (2005).
17. S. A. Kreher, D. Mathew, J. Kim, J. R. Carlson, Translation of sensory input into behavioral output via an olfactory system. *Neuron* **59**, 110–124 (2008).
18. M. L. Bernasconi, T. C. J. Turlings, L. Ambrosetti, P. Bassetti, S. Dorn, Herbivore-induced emissions of maize volatiles repel the corn leaf aphid, *Rhopalosiphum maidis*. *Entomol. Exp. Appl.* **87**, 133–142 (1998).
19. Y. Lin, M. Qasim, M. Hussain, K. S. Akutse, P. B. Avery, C. K. Dash, L. Wang, The herbivore-induced plant volatiles methyl salicylate and menthol positively affect growth and pathogenicity of entomopathogenic fungi. *Sci. Rep.* **7**, 40494 (2017).

20. G. Si, J. K. Kanwal, Y. Hu, C. J. Tabone, J. Baron, M. Berck, G. Vignoud, A. D. T. Samuel, Structured odorant response patterns across a complete olfactory receptor neuron population. *Neuron* **101**, 950–962 (2019).
21. R. A. Baines, J. P. Uhler, A. Thompson, S. T. Sweeney, M. Bate, Altered electrical properties in *Drosophila* neurons developing without synaptic transmission. *J. Neurosci.* **21**, 1523–1531 (2001).
22. W. W. Liu, R. I. Wilson, Glutamate is an inhibitory neurotransmitter in the *Drosophila* olfactory system. *Proc. Natl. Acad. Sci. U.S.A.* **110**, 10294–10299 (2013).
23. A. Huser, M. Eschment, N. Güllü, K. A. N. Collins, K. Böpplé, L. Pankevych, E. Rolsing, A. S. Thum, Anatomy and behavioral function of serotonin receptors in *Drosophila melanogaster* larvae. *PLOS ONE* **12**, e0181865 (2017).
24. T. R. Sizemore, A. M. Dacks, Serotonergic modulation differentially targets distinct network elements within the antennal lobe of *Drosophila melanogaster*. *Sci. Rep.* **6**, 37119 (2016).
25. M. Schlichting, M. M. Díaz, J. Xin, M. Rosbash, Neuron-specific knockouts indicate the importance of network communication to *Drosophila* rhythmicity. *eLife* **8**, e48301 (2019).
26. R. Delventhal, R. M. O'Connor, M. M. Pantalia, M. Ulgherait, H. X. Kim, M. K. Basturk, J. C. Canman, M. Shirasu-Hiza, Dissection of central clock function in *Drosophila* through cell-specific CRISPR-mediated clock gene disruption. *eLife* **8**, e48308 (2019).
27. B. Roy, A. P. Singh, C. Shetty, V. Chaudhary, A. North, M. Landgraf, K. VijayRaghavan, V. Rodrigues, Metamorphosis of an identified serotonergic neuron in the *Drosophila* olfactory system. *Neural Dev.* **2**, 20 (2007).
28. X. Zhang, Q. Gaudry, Functional integration of a serotonergic neuron in the *Drosophila* antennal lobe. *eLife* **5**, e16836 (2016).
29. A. Huser, A. Rohwedder, A. A. Apostolopoulou, A. Widmann, J. E. Pfitzenmaier, E. M. Maiolo, M. Selcho, D. Pauls, A. von Essen, T. Gupta, S. G. Sprecher, S. Birman, T.

- Riemensperger, R. F. Stocker, A. S. Thum, The serotonergic central nervous system of the *Drosophila* larva: Anatomy and behavioral function. *PLOS ONE* **7**, e47518 (2012).
30. T. Giang, S. Rauchfuss, M. Ogueta, H. Scholz, The serotonin transporter expression in *Drosophila melanogaster*. *J. Neurogenet.* **25**, 17–26 (2011).
31. F. F. De-Miguel, C. Trueta, Synaptic and extrasynaptic secretion of serotonin. *Cell. Mol. Neurobiol.* **25**, 297–312 (2005).
32. C. Trueta, F. F. De-Miguel, Extrasynaptic exocytosis and its mechanisms: A source of molecules mediating volume transmission in the nervous system. *Front. Physiol.* **3**, 319 (2012).
33. A. Das, T. Gupta, S. Davla, L. L. Prieto-Godino, S. Diegelmann, O. V. Reddy, K. V. Raghavan, H. Reichert, J. Lovick, V. Hartenstein, Neuroblast lineage-specific origin of the neurons of the *Drosophila* larval olfactory system. *Dev. Biol.* **373**, 322–337 (2013).
34. P. J. Rice, J. R. Coats, Structural requirements for monoterpenoid activity against insects, in *Bioregulators for Crop Protection and Pest Control*, P. A. Hedin, Ed. (American Chemical Society, 1994), vol. 557, chap. 8, pp. 92–108.
35. A. Strutz, J. Soelster, A. Baschwitz, A. Farhan, V. Grabe, J. Rybak, M. Knaden, M. Schmuker, B. S. Hansson, S. Sachse, Decoding odor quality and intensity in the *Drosophila* brain. *eLife* **3**, e04147 (2014).
36. K. Wang, J. Gong, Q. Wang, H. Li, Q. Cheng, Y. Liu, S. Zeng, Z. Wang, Parallel pathways convey olfactory information with opposite polarities in *Drosophila*. *Proc. Natl. Acad. Sci. U.S.A.* **111**, 3164–3169 (2014).
37. I. Tastekin, A. Khandelwal, D. Tadres, N. D. Fessner, J. W. Truman, M. Zlatic, A. Cardona, M. Louis, Sensorimotor pathway controlling stopping behavior during chemotaxis in the *Drosophila melanogaster* larva. *eLife* **7**, e38740 (2018).

38. I. Tastekin, J. Riedl, V. Schilling-Kurz, A. Gomez-Marin, J. W. Truman, M. Louis, Role of the subesophageal zone in sensorimotor control of orientation in *Drosophila* larva. *Curr. Biol.* **25**, 1448–1460 (2015).
39. S. Lin, B. Senapati, C.-H. Tsao, Neural basis of hunger-driven behaviour in *Drosophila*. *Open Biol.* **9**, 180259 (2019).
40. K. Y. Cheng, M. A. Frye, Neuromodulation of insect motion vision. *J. Comp. Physiol. A* **206**, 125–137 (2020).
41. M. M. Sampson, K. M. Meyers Gschweng, B. J. Hardcastle, S. L. Bonanno, T. R. Sizemore, R. C. Arnold, F. Gao, A. M. Dacks, M. A. Frye, D. E. Krantz, Serotonergic modulation of visual neurons in *Drosophila melanogaster*. *PLOS Genet.* **16**, e1009003 (2020).
42. J. A. Strother, S.-T. Wu, E. M. Rogers, J. L. M. Eliason, A. M. Wong, A. Nern, M. B. Reiser, Behavioral state modulates the ON visual motion pathway of *Drosophila*. *Proc. Natl. Acad. Sci. U.S.A.* **115**, E102–E111 (2018).
43. P. Dayan, Q. J. M. Huys, Serotonin in affective control. *Annu. Rev. Neurosci.* **32**, 95–126 (2009).
44. S. M. Kim, C.-Y. Su, J. W. Wang, Neuromodulation of innate behaviors in *Drosophila*. *Annu. Rev. Neurosci.* **40**, 327–348 (2017).
45. J. Bacqué-Cazenave, R. Bharatiya, G. Barrière, J.-P. Delbecque, N. Bouguiyouid, G. Di Giovanni, D. Cattaert, P. De Deurwaerdère, Serotonin in animal cognition and behavior. *Int. J. Mol. Sci.* **21**, 1649 (2020).
46. S. D. Albin, K. R. Kaun, J.-M. Knapp, P. Chung, U. Heberlein, J. H. Simpson, A subset of serotonergic neurons evokes hunger in adult *Drosophila*. *Curr. Biol.* **25**, 2435–2440 (2015).
47. A. M. Dacks, D. S. Green, C. M. Root, A. J. Nighorn, J. W. Wang, Serotonin modulates olfactory processing in the antennal lobe of *Drosophila*. *J. Neurogenet.* **23**, 366–377 (2009).

48. K. E. Coates, A. T. Majot, X. Zhang, C. T. Michael, S. L. Spitzer, Q. Gaudry, A. M. Dacks, Identified serotonergic modulatory neurons have heterogeneous synaptic connectivity within the olfactory system of *Drosophila*. *J. Neurosci.* **37**, 7318–7331 (2017).
49. Q. Gaudry, Serotonergic modulation of olfaction in rodents and insects. *Yale J. Biol. Med.* **91**, 23–32 (2018).
50. V. Kapoor, A. C. Provost, P. Agarwal, V. N. Murthy, Activation of raphe nuclei triggers rapid and distinct effects on parallel olfactory bulb output channels. *Nat. Neurosci.* **19**, 271–282 (2016).
51. D. Brunert, Y. Tsuno, M. Rothermel, M. T. Shipley, M. Wachowiak, Cell-type-specific modulation of sensory responses in olfactory bulb circuits by serotonergic projections from the raphe nuclei. *J. Neurosci.* **36**, 6820–6835 (2016).
52. S. R. Hauser, P. B. Hedlund, A. J. Roberts, Y. Sari, R. L. Bell, E. A. Engleman, The 5-HT7 receptor as a potential target for treating drug and alcohol abuse. *Front. Neurosci.* **8**, 448 (2015).
53. L. Xu, J. He, A. Kaiser, N. Gräber, L. Schläger, Y. Ritze, H. Scholz, A single pair of serotonergic neurons counteracts serotonergic inhibition of ethanol attraction in *Drosophila*. *PLOS ONE* **11**, e0167518 (2016).
54. F. Port, S. L. Bullock, Augmenting CRISPR applications in *Drosophila* with tRNA-flanked sgRNAs. *Nat. Methods* **13**, 852–854 (2016).
55. I. W. Keeseey, M. Knaden, B. S. Hansson, Olfactory specialization in *Drosophila suzukii* supports an ecological shift in host preference from rotten to fresh fruit. *J. Chem. Ecol.* **41**, 121–128 (2015).
56. L. Hernandez-Nunez, J. Belina, M. Klein, G. Si, L. Claus, J. R. Carlson, A. D. T. Samuel, Reverse-correlation analysis of navigation dynamics in *Drosophila* larva using optogenetics. *eLife* **4**, e06225 (2015).



57. M. Gershow, M. Berck, D. Mathew, L. Luo, E. A. Kane, J. R. Carlson, A. D. T. Samuel, Controlling airborne cues to study small animal navigation. *Nat. Methods* **9**, 290–296 (2012).
58. J. Becnel, O. Johnson, J. Luo, D. R. Nässel, C. D. Nichols, The serotonin 5-HT7Dro receptor is expressed in the brain of *Drosophila*, and is essential for normal courtship and mating. *PLOS ONE* **6**, e20800 (2011).
59. J. Luo, J. Becnel, C. D. Nichols, D. R. Nässel, Insulin-producing cells in the brain of adult *Drosophila* are regulated by the serotonin 5-HT1A receptor. *Cell. Mol. Life Sci.* **69**, 471–484 (2012).
